# Supplementary material for: Identifying Outcome Measures for Coronary Artery Disease Value-Based Contracting Using the Delphi Method
Source: Springer Nature journal article supplement (doi:10.1007/s40119-019-0132-7), 2019-03-01
Supplement: MOESM1 [file 16520486]

Supplemental Figure S1. Delphi Questionnaire.

**UPMC** Center for High-Value Health Care

**UPMC Center for Value-Based Pharmacy Initiatives (VBPI)  
Coronary Artery Disease Program**

The purpose of this research is to evaluate heart disease measures currently used to monitor heart disease and to understand which measures are the most meaningful and valuable to patients living with heart disease. We will be consulting a panel of people considered to be experts on heart disease (including yourself), and will ask them to complete a brief online survey (below). This survey will use the Delphi Method, where experts answer questionnaires in two or more rounds. If you are willing to participate, the survey will ask about different heart disease measures (for example, chest pain) and what different measures mean to you. Of note, some measures apply to certain stages of heart disease (for example, some are related to heart procedures). **This survey should take you no more than 5-10 minutes to complete.**

**1. Are you a patient, caregiver, provider, payer, pharmaceutical company representative, or pharmacy benefits manager representative (please select one)?**

|                          |                        |                          |                                               |
|--------------------------|------------------------|--------------------------|-----------------------------------------------|
| <input type="checkbox"/> | Patient                | <input type="checkbox"/> | Payer                                         |
| <input type="checkbox"/> | Provider- Cardiologist | <input type="checkbox"/> | Pharmaceutical Company Representative         |
| <input type="checkbox"/> | Provider- Primary Care | <input type="checkbox"/> | Pharmaceutical Benefits Manger Representative |

**2. Have you had any of the following procedures?**

|                          |             |                          |                                              |
|--------------------------|-------------|--------------------------|----------------------------------------------|
| <input type="checkbox"/> | Heart Stent | <input type="checkbox"/> | Heart Surgery (including open-heart surgery) |
| <input type="checkbox"/> | Both        | <input type="checkbox"/> | Neither                                      |

**3. When a medication is started for heart disease, how important are the following measures?**

|                                                                                           | Not Important            | Slightly Important       | Moderately Important     | Important                | Very Important           |
|-------------------------------------------------------------------------------------------|--------------------------|--------------------------|--------------------------|--------------------------|--------------------------|
| Preventing heart attacks                                                                  | <input type="checkbox"/> |
| Preventing stent blockage (for patients with heart stents)                                | <input type="checkbox"/> |
| Preventing need for a repeat heart procedure (for patients who have had heart procedures) | <input type="checkbox"/> |

|                                                                                                                                                                       |                          |                          |                          |                          |                          |
|-----------------------------------------------------------------------------------------------------------------------------------------------------------------------|--------------------------|--------------------------|--------------------------|--------------------------|--------------------------|
| Preventing stroke or mini-stroke                                                                                                                                      | <input type="checkbox"/> |
| Preventing death                                                                                                                                                      | <input type="checkbox"/> |
| Reducing chest pain                                                                                                                                                   | <input type="checkbox"/> |
| Reducing shortness of breath                                                                                                                                          | <input type="checkbox"/> |
| Reducing depression symptoms                                                                                                                                          | <input type="checkbox"/> |
| Preventing missed days of work                                                                                                                                        | <input type="checkbox"/> |
| Reducing fatigue                                                                                                                                                      | <input type="checkbox"/> |
| Improving function                                                                                                                                                    | <input type="checkbox"/> |
| Improving quality of life                                                                                                                                             | <input type="checkbox"/> |
| Preventing heart failure from heart disease                                                                                                                           | <input type="checkbox"/> |
| Reducing medication complications like major bleeding (for example, bleeding into the brain or bleeding from the gastrointestinal tract requiring blood transfusions) | <input type="checkbox"/> |
| Reducing medication complications like minor bleeding (for example, nose bleeds)                                                                                      | <input type="checkbox"/> |
| Preventing heart medication switches because of failure of treatment, side effects, or other issues with medications                                                  | <input type="checkbox"/> |

**4. If we had to limit the number of heart disease measures to 3 that are most meaningful, which ones would you choose to keep (please select only 3)?**

- |                          |                                                            |
|--------------------------|------------------------------------------------------------|
| <input type="checkbox"/> | Preventing heart attacks                                   |
| <input type="checkbox"/> | Preventing stent blockage (for patients with heart stents) |

|                          |                                                                                                                                                                       |
|--------------------------|-----------------------------------------------------------------------------------------------------------------------------------------------------------------------|
| <input type="checkbox"/> | Preventing need for a repeat heart procedure (for patients who have had heart procedures)                                                                             |
| <input type="checkbox"/> | Preventing stroke or mini-stroke                                                                                                                                      |
| <input type="checkbox"/> | Preventing death                                                                                                                                                      |
| <input type="checkbox"/> | Reducing chest pain                                                                                                                                                   |
| <input type="checkbox"/> | Reducing shortness of breath                                                                                                                                          |
| <input type="checkbox"/> | Reducing depression symptoms                                                                                                                                          |
| <input type="checkbox"/> | Preventing missed days of work                                                                                                                                        |
| <input type="checkbox"/> | Reducing fatigue                                                                                                                                                      |
| <input type="checkbox"/> | Improving function                                                                                                                                                    |
| <input type="checkbox"/> | Improving quality of life                                                                                                                                             |
| <input type="checkbox"/> | Preventing heart failure from heart disease                                                                                                                           |
| <input type="checkbox"/> | Reducing medication complications like major bleeding (for example, bleeding into the brain or bleeding from the gastrointestinal tract requiring blood transfusions) |
| <input type="checkbox"/> | Reducing medication complications like minor bleeding (for example, nose bleeds)                                                                                      |
| <input type="checkbox"/> | Preventing heart medication switches because of failure of treatment, side effects, or other issues with medications                                                  |

**5. Are there any important measures for heart disease that we are missing?**
